# Supplementary material for: Genome-Wide Identification and Characterisation of Wheat MATE Genes Reveals Their Roles in Aluminium Tolerance
Source: Int J Mol Sci. 2022 Apr 16;23(8):4418. doi: 10.3390/ijms23084418 (PMC9030646; doi:10.3390/ijms23084418)
Supplement: Supplementary file 1 [file ijms-23-04418-s001.zip › Supplemental Table S1-S4.xlsx]

## Sheet: TableS1
Table S1. Characteristics of the TaMATE gene family members in wheat.
Gene name	Subject name	cds length	protein length	pI	Mw (Da)	Genomic Location	Orientation	Subcellular localization
TaMATE1	TraesCS1A03G0068000.1	1545	514	5.98	54892.3	1A:13971819 - 13976728	Forward	PlasmaMembrane
TaMATE2	TraesCS1A03G0073500.1	1449	482	7.57	52128.1	1A:15343594 - 15348515	Reverse	PlasmaMembrane
TaMATE3	TraesCS1A03G0505100.1	1659	552	6.14	57843.6	1A:339913769 - 339916147	Reverse	PlasmaMembrane
TaMATE4	TraesCS1A03G0758200.1	1497	498	6.21	53083.6	1A:497862698 - 497868466	Reverse	PlasmaMembrane
TaMATE5	TraesCS1A03G0919900.1	1485	494	7.52	52275	1A:551874880 - 551879890	Forward	PlasmaMembrane
TaMATE6	TraesCS1B03G0034600.1	1008	335	8.67	36148.5	1B:8144177 - 8149251	Reverse	PlasmaMembrane
TaMATE7	TraesCS1B03G0074100.1	1545	514	5.47	54907.3	1B:17681156 - 17687028	Forward	PlasmaMembrane
TaMATE8	TraesCS1B03G0576700.1	1659	552	5.91	57735.3	1B:352333774 - 352335843	Reverse	PlasmaMembrane
TaMATE9	TraesCS1B03G0867500.1	1497	498	6.21	53240.9	1B:540313752 - 540319802	Reverse	PlasmaMembrane
TaMATE10	TraesCS1B03G1006700.1	1443	480	8.9	50780.6	1B:599499788 - 599514716	Reverse	PlasmaMembrane
TaMATE11	TraesCS1D03G0021300.1	1509	502	6.59	54080.2	1D:5343240 - 5348712	Reverse	PlasmaMembrane
TaMATE12	TraesCS1D03G0057900.1	1542	513	5.73	54890.3	1D:11849875 - 11854704	Forward	PlasmaMembrane
TaMATE13	TraesCS1D03G0064400.1	1449	482	8.02	52054.1	1D:14688697 - 14709637	Forward	PlasmaMembrane
TaMATE14	TraesCS1D03G0482200.1	2659	552	5.77	57906.5	1D:260588411 - 260590166	Forward	PlasmaMembrane
TaMATE15	TraesCS1D03G0727000.1	1497	498	6.21	53057.6	1D:402320212 - 402326064	Reverse	PlasmaMembrane
TaMATE16	TraesCS1D03G0839700.1	1434	477	8.56	50442.1	1D:441307030 - 441309310	Reverse	PlasmaMembrane
TaMATE17	TraesCS1D03G0902900.2	1482	493	6.97	52136.8	1D:460789199 - 460794120	Forward	PlasmaMembrane
TaMATE18	TraesCS2A03G0285000.1	1452	483	8.55	51728.4	2A:84552276 - 84555098	Reverse	PlasmaMembrane
TaMATE19	TraesCS2A03G0423200.1	1542	513	6.4	55220.5	2A:176560970 - 176569723	Forward	PlasmaMembrane
TaMATE20	TraesCS2A03G0476300.1	1488	495	6.33	52289	2A:213109869 - 213114628	Reverse	PlasmaMembrane
TaMATE21	TraesCS2A03G0643900.1	1479	492	7.56	52941.7	2A:412507140 - 412511243	Forward	PlasmaMembrane
TaMATE22	TraesCS2A03G0692900.2	1446	481	8.67	51957	2A:461388193 - 461391808	Forward	PlasmaMembrane
TaMATE23	TraesCS2A03G0693500.1	1422	473	8.74	50633.9	2A:461411285 - 461417775	Forward	PlasmaMembrane
TaMATE24	TraesCS2A03G0961300.1	1671	556	8.14	58432.6	2A:652999871 - 653002090	Forward	PlasmaMembrane
TaMATE25	TraesCS2A03G1238200.1	1431	476	9.39	51269.2	2A:750176324 - 750180545	Reverse	PlasmaMembrane
TaMATE26	TraesCS2B03G0395600.1	1452	483	8.26	52002.7	2B:135691462 - 135697994	Reverse	PlasmaMembrane
TaMATE27	TraesCS2B03G0552200.1	1464	487	5.66	52224.1	2B:224580810 - 224589649	Forward	PlasmaMembrane
TaMATE28	TraesCS2B03G0598200.2	1401	466	6.82	49398.5	2B:254284921 - 254289034	Reverse	PlasmaMembrane
TaMATE29	TraesCS2B03G0726800.1	1479	492	8.3	52957.9	2B:387077653 - 387081642	Reverse	PlasmaMembrane
TaMATE30	TraesCS2B03G0773700.1	1446	481	8.68	51977.1	2B:412989047 - 412992654	Forward	PlasmaMembrane
TaMATE31	TraesCS2B03G0773800.1	1467	488	8.53	52282.6	2B:413061420 - 413064898	Forward	PlasmaMembrane
TaMATE32	TraesCS2B03G1064800.1	1671	556	7.43	58376.4	2B:598560483 - 598562634	Forward	PlasmaMembrane
TaMATE33	TraesCS2B03G1536400.1	1446	481	5.75	51545.5	2B:792122230 - 792124769	Reverse	PlasmaMembrane
TaMATE34	TraesCS2D03G0298500.1	1314	437	8.75	46895.1	2D:83822186 - 83824623	Reverse	PlasmaMembrane
TaMATE35	TraesCS2D03G0482300.1	1485	494	7.49	52206	2D:196855953 - 196860698	Reverse	PlasmaMembrane
TaMATE36	TraesCS2D03G0604900.1	1479	492	7.56	52985.8	2D:318554784 - 318558536	Reverse	PlasmaMembrane
TaMATE37	TraesCS2D03G0643600.1	1446	481	8.68	52001	2D:347791529 - 347794299	Forward	PlasmaMembrane
TaMATE38	TraesCS2D03G0643900.1	1452	483	8.49	51375.6	2D:347807207 - 347809884	Forward	PlasmaMembrane
TaMATE39	TraesCS2D03G0903000.1	1674	557	7.87	58463.6	2D:509229163 - 509231203	Forward	PlasmaMembrane
TaMATE40	TraesCS3A03G0058300.1	1425	474	9.13	50441.4	3A:15451497 - 15454802	Forward	PlasmaMembrane
TaMATE41	TraesCS3A03G0090100.1	1509	502	5.81	53812.5	3A:24002848 - 24005127	Reverse	PlasmaMembrane
TaMATE42	TraesCS3A03G0117600.1	1452	483	8.77	52284.6	3A:32224350 - 32234406	Reverse	PlasmaMembrane
TaMATE43	TraesCS3A03G0585600.2	1203	400	8.06	42521	3A:429462797 - 429464846	Forward	PlasmaMembrane
TaMATE44	TraesCS3A03G0673200.1	1455	484	8.64	51172.9	3A:489565727 - 489568954	Forward	PlasmaMembrane
TaMATE45	TraesCS3A03G0748300.1	1440	479	9.44	51351.6	3A:534467102 - 534470083	Forward	PlasmaMembrane
TaMATE46	TraesCS3A03G1172800.1	1500	499	5.49	53633.8	3A:724482484 - 724486741	Forward	PlasmaMembrane
TaMATE47	TraesCS3A03G1172900.1	1497	498	5.37	53174	3A:724491246 - 724496807	Reverse	PlasmaMembrane
TaMATE48	TraesCS3A03G1173900.1	1494	497	5.98	53413.2	3A:724590950 - 724598554	Forward	PlasmaMembrane
TaMATE49	TraesCS3A03G1174300.1	1497	498	5.76	53352.1	3A:724645017 - 724653750	Reverse	PlasmaMembrane
TaMATE50	TraesCS3B03G0063200.1	1539	512	8.99	54976.4	3B:12100374 - 12104292	Reverse	PlasmaMembrane
TaMATE51	TraesCS3B03G0088900.1	1497	498	8.74	53552.3	3B:18870903 - 18873920	Forward	PlasmaMembrane
TaMATE52	TraesCS3B03G0155000.1	1764	587	9.01	63558.8	3B:40848613 - 40854170	Reverse	PlasmaMembrane
TaMATE53	TraesCS3B03G0665800.1	1353	450	8.87	47516.7	3B:411504743 - 411507848	Reverse	PlasmaMembrane
TaMATE54	TraesCS3B03G0770000.1	1455	484	8.04	51353.1	3B:479494593 - 479497571	Forward	PlasmaMembrane
TaMATE55	TraesCS3B03G0853900.1	1434	477	9.23	51074.9	3B:542510409 - 542512878	Reverse	PlasmaMembrane
TaMATE56	TraesCS3B03G1200900.1	1659	552	8.18	59163.5	3B:731479091 - 731487249	Forward	PlasmaMembrane
TaMATE57	TraesCS3B03G1404500.1	1491	496	5.65	53324.5	3B:795567880 - 795572491	Forward	PlasmaMembrane
TaMATE58	TraesCS3B03G1406200.2	1482	493	5.76	52790.4	3B:796008219 - 796019084	Forward	PlasmaMembrane
TaMATE59	TraesCS3B03G1406700.1	1491	496	6.31	53035.5	3B:796305387 - 796316199	Forward	PlasmaMembrane
TaMATE60	TraesCS3B03G1407400.1	1347	448	5.71	47829.9	3B:796454133 - 796466160	Forward	PlasmaMembrane
TaMATE61	TraesCS3B03G1407600.1	1503	500	5.76	53501.1	3B:796501599 - 796509551	Reverse	PlasmaMembrane
TaMATE62	TraesCS3B03G1407800.1	1497	498	5.61	53512.1	3B:796651381 - 796659282	Reverse	PlasmaMembrane
TaMATE63	TraesCS3D03G0030100.1	1437	478	9.08	51041.1	3D:5757697 - 5761111	Reverse	PlasmaMembrane
TaMATE64	TraesCS3D03G0065600.1	1509	502	6.37	54075.7	3D:13190241 - 13192446	Forward	PlasmaMembrane
TaMATE65	TraesCS3D03G0103800.1	1728	575	7.17	62180.2	3D:23147649 - 23159866	Reverse	PlasmaMembrane
TaMATE66	TraesCS3D03G0539100.1	1383	460	8.34	49103.6	3D:309688331 - 309691049	Forward	PlasmaMembrane
TaMATE67	TraesCS3D03G0614500.1	1455	484	8.69	51292.1	3D:367357140 - 367360253	Forward	PlasmaMembrane
TaMATE68	TraesCS3D03G0688500.1	1428	475	9.36	50809.7	3D:415681109 - 415684129	Reverse	PlasmaMembrane
TaMATE69	TraesCS3D03G1116500.1	1500	499	5.49	53607.7	3D:593214242 - 593218444	Forward	PlasmaMembrane
TaMATE70	TraesCS3D03G1116600.1	1482	493	5.37	52536.3	3D:593220898 - 593226833	Reverse	PlasmaMembrane
TaMATE71	TraesCS3D03G1117400.1	1485	494	6.99	52910.7	3D:593334421 - 593344791	Forward	PlasmaMembrane
TaMATE72	TraesCS3D03G1117700.1	1500	499	5.62	53603.2	3D:593439857 - 593448849	Reverse	PlasmaMembrane
TaMATE73	TraesCS4A03G0117600.1	1920	639	6.32	65986	4A:55377186 - 55380060	Reverse	PlasmaMembrane
TaMATE74	TraesCS4A03G0132700.1	1665	554	7.9	58193.8	4A:64136036 - 64146901	Forward	PlasmaMembrane
TaMATE75	TraesCS4A03G0491000.1	1653	550	5.21	57856.4	4A:454816458 - 454820452	Reverse	PlasmaMembrane
TaMATE76	TraesCS4A03G0646500.1	1425	474	9.12	50955.9	4A:555515710 - 555523999	Reverse	PlasmaMembrane
TaMATE77	TraesCS4A03G0646700.1	1431	476	8.91	51503.3	4A:555559055 - 555564385	Reverse	PlasmaMembrane
TaMATE78	TraesCS4A03G0790600.1	1563	520	9.5	54671.6	4A:606411251 - 606412810	Forward	PlasmaMembrane
TaMATE79	TraesCS4A03G0866700.1	1551	516	8.56	53616.2	4A:626439275 - 626443664	Reverse	PlasmaMembrane
TaMATE80	TraesCS4A03G1005700.1	1491	496	6.39	53552.7	4A:678127054 - 678131552	Forward	PlasmaMembrane
TaMATE81	TraesCS4B03G0154500.1	1419	472	8.92	50981.8	4B:64077940 - 64084092	Forward	PlasmaMembrane
TaMATE82	TraesCS4B03G0154600.1	1425	474	9.21	50870.9	4B:64093458 - 64111980	Forward	PlasmaMembrane
TaMATE83	TraesCS4B03G0302700.1	1503	500	8.63	54255.3	4B:168159714 - 168192894	Forward	PlasmaMembrane
TaMATE84	TraesCS4B03G0641100.1	1929	642	6.57	66285.4	4B:489647704 - 489650582	Reverse	PlasmaMembrane
TaMATE85	TraesCS4B03G0664600.1	1665	554	8.16	58173.7	4B:506133418 - 506143589	Forward	PlasmaMembrane
TaMATE86	TraesCS4B03G0796500.1	1491	496	6.39	53542.7	4B:592624831 - 592629372	Forward	PlasmaMembrane
TaMATE87	TraesCS4B03G0991800.1	1503	500	7.47	53293.3	4B:665854652 - 665867639	Forward	PlasmaMembrane
TaMATE88	TraesCS4D03G0130300.1	1431	476	8.78	51443.1	4D:44418954 - 44425006	Forward	PlasmaMembrane
TaMATE89	TraesCS4D03G0130400.1	1425	474	9.21	50956.9	4D:44431202 - 44437454	Forward	PlasmaMembrane
TaMATE90	TraesCS4D03G0247400.1	1500	499	8.58	54388.5	4D:108214968 - 108218927	Reverse	PlasmaMembrane
TaMATE91	TraesCS4D03G0263000.1	1656	551	5.13	58049.6	4D:118570076 - 118575310	Forward	PlasmaMembrane
TaMATE92	TraesCS4D03G0569700.1	1917	638	6.46	65922.9	4D:397666022 - 397668905	Reverse	PlasmaMembrane
TaMATE93	TraesCS4D03G0589400.1	1665	554	7.5	58142.6	4D:409640692 - 409650357	Reverse	PlasmaMembrane
TaMATE94	TraesCS4D03G0712800.1	1491	496	6.18	53555.7	4D:470230033 - 470236094	Forward	PlasmaMembrane
TaMATE95	TraesCS5A03G0082100.1	1509	502	5.65	54376.5	5A:30407025 - 30409182	Forward	vacuolar membrane
TaMATE96	TraesCS5A03G0396000.1	1521	506	6.01	54850	5A:315332650 - 315336047	Forward	PlasmaMembrane
TaMATE97	TraesCS5A03G0416500.1	1560	519	6.24	54656.1	5A:328940151 - 328944360	Reverse	PlasmaMembrane
TaMATE98	TraesCS5A03G0619800.1	1434	477	8.36	50955.4	5A:461903275 - 461905888	Forward	PlasmaMembrane
TaMATE99	TraesCS5A03G0759600.1	1587	528	8.41	55732	5A:523815412 - 523817450	Forward	PlasmaMembrane
TaMATE100	TraesCS5A03G0792000.1	1488	495	5.62	52798.8	5A:536768204 - 536774335	Forward	PlasmaMembrane
TaMATE101	TraesCS5A03G0792800.1	1539	512	8.41	55665.4	5A:536878914 - 536886454	Forward	PlasmaMembrane
TaMATE102	TraesCS5A03G0838800.1	1296	431	7.6	47259.7	5A:552314394 - 552316690	Forward	PlasmaMembrane
TaMATE103	TraesCS5A03G0838900.1	1494	497	8.66	54108.4	5A:552372187 - 552377259	Forward	PlasmaMembrane
TaMATE104	TraesCS5A03G0849800.1	1515	504	4.98	54590.6	5A:555773219 - 555775385	Forward	vacuolar membrane
TaMATE105	TraesCS5A03G0887600.1	1452	483	8.61	51410.8	5A:569151687 - 569154131	Forward	PlasmaMembrane
TaMATE106	TraesCS5A03G0888000.2	1434	477	8.87	51020.2	5A:569181349 - 569184876	Reverse	PlasmaMembrane
TaMATE107	TraesCS5A03G0888100.1	1452	483	8.39	51818.1	5A:569217168 - 569219804	Reverse	PlasmaMembrane
TaMATE108	TraesCS5A03G0888200.1	1410	469	8.35	49833.4	5A:569221139 - 569225973	Reverse	PlasmaMembrane
TaMATE109	TraesCS5A03G1291000.1	1503	500	7.47	53265.3	5A:705822210 - 705833372	Forward	PlasmaMembrane
TaMATE110	TraesCS5B03G0084900.1	1509	502	5.16	54263.3	5B:36722963 - 36725139	Forward	vacuolar membrane
TaMATE111	TraesCS5B03G0413100.1	1563	520	6.23	54713.2	5B:278224950 - 278228394	Reverse	PlasmaMembrane
TaMATE112	TraesCS5B03G0636800.1	1419	472	9.15	50015.8	5B:426585989 - 426589020	Forward	PlasmaMembrane
TaMATE113	TraesCS5B03G0636900.1	1437	478	6.31	50919.3	5B:426590594 - 426592936	Forward	PlasmaMembrane
TaMATE114	TraesCS5B03G0824000.1	1542	513	6.33	54826.2	5B:510879933 - 510885336	Forward	PlasmaMembrane
TaMATE115	TraesCS5B03G0876400.1	1482	493	7.63	53895.1	5B:531214554 - 531222749	Forward	PlasmaMembrane
TaMATE116	TraesCS5B03G0876600.1	1491	496	8.51	53634.9	5B:531294777 - 531300705	Forward	PlasmaMembrane
TaMATE117	TraesCS5B03G0892000.1	1515	504	5	54516.5	5B:535113790 - 535115987	Forward	vacuolar membrane
TaMATE118	TraesCS5B03G0934400.1	807	268	8.59	28555.5	5B:549711201 - 549712117	Forward	PlasmaMembrane
TaMATE119	TraesCS5B03G0935500.1	1476	491	7.92	52585	5B:549946902 - 549949292	Reverse	PlasmaMembrane
TaMATE120	TraesCS5B03G0935800.1	1236	411	8.8	44459.6	5B:549951470 - 549955432	Reverse	PlasmaMembrane
TaMATE121	TraesCS5B03G1008700.1	1422	473	8.94	50966.3	5B:584085197 - 584096517	Reverse	PlasmaMembrane
TaMATE122	TraesCS5B03G1270300.1	1548	515	8.56	53668.2	5B:684227667 - 684231381	Forward	PlasmaMembrane
TaMATE123	TraesCS5B03G1361100.1	1569	522	9.18	54537.3	5B:708336545 - 708338110	Reverse	PlasmaMembrane
TaMATE124	TraesCS5D03G0106000.1	1509	502	5.64	54317.5	5D:42019333 - 42021505	Forward	vacuolar membrane
TaMATE125	TraesCS5D03G0372800.1	1521	506	5.65	55024.2	5D:238778031 - 238783442	Reverse	PlasmaMembrane
TaMATE126	TraesCS5D03G0384500.1	1644	547	8.5	57725.7	5D:244701198 - 244705125	Reverse	PlasmaMembrane
TaMATE127	TraesCS5D03G0585400.1	1419	472	8.88	49981.9	5D:360998152 - 361000992	Reverse	PlasmaMembrane
TaMATE128	TraesCS5D03G0719700.1	1578	525	8.42	55327.5	5D:412076819 - 412078393	Forward	PlasmaMembrane
TaMATE129	TraesCS5D03G0801100.1	594	197	7.67	21658	5D:437037261 - 437041939	Forward	PlasmaMembrane
TaMATE130	TraesCS5D03G0801400.1	1509	502	8.32	54616.9	5D:437063037 - 437067540	Forward	PlasmaMembrane
TaMATE131	TraesCS5D03G0812000.1	1515	504	5.08	54536.5	5D:440162879 - 440165066	Forward	vacuolar membrane
TaMATE132	TraesCS5D03G0850300.1	1491	496	8.53	53231.7	5D:449933900 - 449938536	Reverse	PlasmaMembrane
TaMATE133	TraesCS5D03G0850400.1	1452	483	8.2	51580.7	5D:449938650 - 449940909	Reverse	PlasmaMembrane
TaMATE134	TraesCS5D03G0850500.1	1452	483	8.18	51911.2	5D:449980581 - 449983211	Reverse	PlasmaMembrane
TaMATE135	TraesCS5D03G0914100.1	1434	477	8.76	51084.3	5D:476671820 - 476674056	Reverse	PlasmaMembrane
TaMATE136	TraesCS5D03G1139200.1	786	261	8.17	27424.7	5D:542589766 - 542592882	Forward	PlasmaMembrane
TaMATE137	TraesCS5D03G1204100.1	1575	524	9.23	54878.6	5D:564976204 - 564977775	Forward	PlasmaMembrane
TaMATE138	TraesCS6A03G0149600.1	1482	493	9.07	52016.1	6A:35630053 - 35637447	Forward	PlasmaMembrane
TaMATE139	TraesCS6A03G0691400.1	1722	573	7.96	60108.3	6A:475999747 - 476001841	Forward	PlasmaMembrane
TaMATE140	TraesCS6A03G0900600.1	1455	484	8.2	52172.3	6A:582248516 - 582254826	Forward	PlasmaMembrane
TaMATE141	TraesCS6A03G1002600.1	1527	508	5.36	53607.1	6A:609478929 - 609480907	Reverse	PlasmaMembrane
TaMATE142	TraesCS6A03G1002700.1	1683	560	5.41	59317.2	6A:609551300 - 609553421	Forward	PlasmaMembrane
TaMATE143	TraesCS6A03G1050800.2	1683	560	9.12	58203.8	6A:616737818 - 616743764	Reverse	PlasmaMembrane
TaMATE144	TraesCS6B03G0212600.1	1545	514	9.31	55092.4	6B:65725026 - 65732158	Forward	PlasmaMembrane
TaMATE145	TraesCS6B03G0785400.1	1722	573	7.93	59852.9	6B:484099232 - 484101310	Reverse	PlasmaMembrane
TaMATE146	TraesCS6B03G1083100.1	1455	484	7.93	52214.3	6B:658291240 - 658297903	Forward	PlasmaMembrane
TaMATE147	TraesCS6B03G1229500.1	1518	505	5.25	53279.9	6B:705473350 - 705475252	Forward	PlasmaMembrane
TaMATE148	TraesCS6B03G1229700.1	1683	560	5.24	59439.3	6B:705490657 - 705492625	Forward	PlasmaMembrane
TaMATE149	TraesCS6D03G0932700.1	1299	432	9.42	45236.3	6B:718765354 - 718775528	Forward	PlasmaMembrane
TaMATE150	TraesCS6D03G0579700.1	1722	573	8.41	60264.5	6D:336366087 - 336368228	Forward	PlasmaMembrane
TaMATE151	TraesCS6D03G0772400.1	1461	486	6.59	52471.5	6D:435300309 - 435308407	Forward	PlasmaMembrane
TaMATE152	TraesCS6D03G0883600.1	1527	508	5.88	53647.2	6D:462634503 - 462636026	Reverse	PlasmaMembrane
TaMATE153	TraesCS6D03G0883800.1	1677	558	5.51	59144.1	6D:462689456 - 462691719	Forward	PlasmaMembrane
TaMATE154	TraesCS6D03G0932700.1	1791	596	9.02	62284.4	6D:473363896 - 473373881	Forward	PlasmaMembrane
TaMATE155	TraesCS7A03G0070800.1	1431	476	8.65	50639.6	7A:14444265 - 14447077	Reverse	PlasmaMembrane
TaMATE156	TraesCS7A03G0307600.1	1464	487	7.6	53068.7	7A:83774386 - 83779103	Forward	PlasmaMembrane
TaMATE157	TraesCS7A03G0310300.1	1278	425	6.2	45177.9	7A:84854551 - 84857479	Forward	PlasmaMembrane
TaMATE158	TraesCS7A03G0310600.1	1434	477	5.61	50787.3	7A:85030810 - 85033630	Forward	PlasmaMembrane
TaMATE159	TraesCS7A03G0534600.1	1455	484	7.98	52383.5	7A:200599649 - 200608278	Reverse	PlasmaMembrane
TaMATE160	TraesCS7A03G0534800.1	1458	485	6.7	52240.4	7A:200624299 - 200634543	Reverse	PlasmaMembrane
TaMATE161	TraesCS7A03G0535400.1	1455	484	5.46	52087.9	7A:200902314 - 200908486	Reverse	PlasmaMembrane
TaMATE162	TraesCS7A03G0554100.1	1443	480	5.01	51042.5	7A:217202534 - 217205919	Forward	PlasmaMembrane
TaMATE163	TraesCS7A03G0627000.1	1671	556	9.11	58136.8	7A:274661225 - 274663027	Reverse	PlasmaMembrane
TaMATE164	TraesCS7A03G0636600.1	1515	504	6.52	53916.8	7A:286223283 - 286225703	Reverse	PlasmaMembrane
TaMATE165	TraesCS7A03G0872000.1	1734	577	8.11	60095.2	7A:523146060 - 523148106	Reverse	PlasmaMembrane
TaMATE166	TraesCS7A03G0998400.1	1461	486	7.94	52091.8	7A:602806884 - 602813316	Reverse	PlasmaMembrane
TaMATE167	TraesCS7A03G1146600.1	1428	475	9.25	50175.3	7A:669028823 - 669031411	Reverse	PlasmaMembrane
TaMATE168	TraesCS7A03G1167100.1	1443	480	6.52	50609	7A:674273136 - 674275483	Reverse	PlasmaMembrane
TaMATE169	TraesCS7A03G1198300.1	1431	476	8.92	50560.8	7A:682890340 - 682892292	Reverse	PlasmaMembrane
TaMATE170	TraesCS7A03G1206000.1	1422	473	8.65	50348.5	7A:687953125 - 687955283	Forward	PlasmaMembrane
TaMATE171	TraesCS7A03G1216000.1	1431	476	8.69	50981.1	7A:690532250 - 690534408	Forward	PlasmaMembrane
TaMATE172	TraesCS7A03G1348900.1	1416	471	7.54	50949.6	7A:726856879 - 726859615	Reverse	PlasmaMembrane
TaMATE173	TraesCS7B03G0081700.1	1470	489	8.4	53018.7	7B:29050839 - 29056456	Forward	PlasmaMembrane
TaMATE174	TraesCS7B03G0085800.1	1443	480	6.88	51135.9	7B:32330398 - 32333033	Forward	PlasmaMembrane
TaMATE175	TraesCS7B03G0086300.1	1434	477	6.1	50729.2	7B:32408247 - 32411428	Forward	PlasmaMembrane
TaMATE176	TraesCS7B03G0372300.1	1443	480	5	51088.5	7B:169432947 - 169436321	Forward	PlasmaMembrane
TaMATE177	TraesCS7B03G0452400.1	1566	521	9.04	54605.9	7B:233025980 - 233027801	Reverse	PlasmaMembrane
TaMATE178	TraesCS7B03G0461100.1	1515	504	6.59	54165	7B:242985898 - 242987962	Reverse	PlasmaMembrane
TaMATE179	TraesCS7B03G0351400.1	1233	410	8.58	44707.7	7B:337114970 - 337116929	Reverse	PlasmaMembrane
TaMATE180	TraesCS7B03G0351500.1	1458	485	6.45	52201.3	7B:337125651 - 337158885	Reverse	PlasmaMembrane
TaMATE181	TraesCS7B03G0352200.1	1470	489	5.32	52504.3	7B:337368063 - 337372502	Reverse	PlasmaMembrane
TaMATE182	TraesCS7B03G0740100.1	1734	577	6.9	59829.8	7B:496656892 - 496658744	Forward	PlasmaMembrane
TaMATE183	TraesCS7B03G1006500.1	1482	493	8.74	52261.2	7B:639847994 - 639850632	Reverse	PlasmaMembrane
TaMATE184	TraesCS7B03G1034400.1	1437	478	8.14	50364.7	7B:650128138 - 650130058	Reverse	PlasmaMembrane
TaMATE185	TraesCS7B03G1077500.1	1422	473	8.68	50278.3	7B:666683172 - 666685435	Reverse	PlasmaMembrane
TaMATE186	TraesCS7B03G1098500.1	1431	476	8.41	50809.9	7B:677113513 - 677115605	Reverse	PlasmaMembrane
TaMATE187	TraesCS7B03G1285600.1	1158	385	5.75	41654.7	7B:733357053 - 733359534	Reverse	PlasmaMembrane
TaMATE188	TraesCS7B03G1286900.1	1416	471	6.98	50822.3	7B:733750364 - 733753039	Forward	PlasmaMembrane
TaMATE189	TraesCS7B03G1287200.1	1416	471	8.03	50853.4	7B:733787855 - 733790541	Forward	PlasmaMembrane
TaMATE190	TraesCS7D03G0032200.1	1434	477	9.54	51039.1	7D:6376366 - 6379191	Reverse	PlasmaMembrane
TaMATE191	TraesCS7D03G0070500.1	1722	573	9.45	60352.6	7D:16321821 - 16337274	Reverse	PlasmaMembrane
TaMATE192	TraesCS7D03G0291500.1	1449	482	8.11	52210.9	7D:81882293 - 81888022	Forward	PlasmaMembrane
TaMATE193	TraesCS7D03G0293000.1	1434	477	5.96	50773.3	7D:82899022 - 82902978	Forward	PlasmaMembrane
TaMATE194	TraesCS7D03G0293300.1	1434	477	5.61	50741.2	7D:83063146 - 83065950	Forward	PlasmaMembrane
TaMATE195	TraesCS7D03G0513200.1	1473	490	5.34	52646.5	7D:192020155 - 192031842	Reverse	PlasmaMembrane
TaMATE196	TraesCS7D03G0536900.1	1443	480	5.01	51136.6	7D:205131618 - 205134934	Forward	PlasmaMembrane
TaMATE197	TraesCS7D03G0609700.1	1566	521	8.89	54397.5	7D:255057487 - 255059348	Reverse	PlasmaMembrane
TaMATE198	TraesCS7D03G0617800.1	1515	504	7.54	53950.8	7D:263503949 - 263506840	Reverse	PlasmaMembrane
TaMATE199	TraesCS7D03G0862000.1	1734	577	7.17	59800.8	7D:472539654 - 472541850	Forward	PlasmaMembrane
TaMATE200	TraesCS2D03G1194100.1	1431	476	9.14	51199.1	7D:498264082 - 498272418	Forward	PlasmaMembrane
TaMATE201	TraesCS7D03G0954500.1	1485	494	8.76	52985.1	7D:522510012 - 522517181	Reverse	PlasmaMembrane
TaMATE202	TraesCS7D03G1091700.3	1206	401	9.1	42788.3	7D:576894559 - 576896986	Forward	PlasmaMembrane
TaMATE203	TraesCS7D03G1113000.1	1437	478	6.99	50553.9	7D:582301738 - 582304043	Reverse	PlasmaMembrane
TaMATE204	TraesCS7D03G1139900.1	1431	476	8.89	50459.5	7D:591803896 - 591806284	Reverse	PlasmaMembrane
TaMATE205	TraesCS7D03G1146500.1	1422	473	8.56	50425.6	7D:594986790 - 594988985	Forward	PlasmaMembrane
TaMATE206	TraesCS7D03G1156600.1	1431	476	8.69	50665.8	7D:598251092 - 598253119	Reverse	PlasmaMembrane
TaMATE207	TraesCS7D03G1276000.1	1416	471	7.06	50924.6	7D:630713185 - 630715883	Forward	PlasmaMembrane
TaMATE208	TraesCS7D03G1276800.1	1416	471	8.24	50855.6	7D:631024107 - 631034967	Forward	PlasmaMembrane
TaMATE209	TraesCSU03G0032200.1	1437	478	9.07	51009	U:35214066 - 35217806	Forward	PlasmaMembrane
TaMATE210	TraesCS6A03G0149600.2	1608	535	9.41	57129.5	U:100837331 - 100847030	Reverse	PlasmaMembrane
TaMATE211	TraesCSU03G0139800.1	1305	434	9.14	46730.7	U:183184607 - 183186534	Reverse	PlasmaMembrane

## Sheet: TableS2
Table S2. List of the primers used for vector construction and subcellular localization
Primer name	Forward（5’—3’）	Reverse（5’—3’）
16318-TaMATE85	TATCTCTAGAGGATCCATGGAGGAGGGCGCGGCCG	TGCTCACCATGGATCCCTTCCGGAGGAAAGCCCATGG
16318-TaMATE100	TATCTCTAGAGGATCCATGGCCACGGACAGCAAGCTG	TGCTCACCATGGATCCTATGTGTACCTCTTTGTTCCAGTCG
16318-TaMATE114	TATCTCTAGAGGATCCATGGCTGCGGACAGCAAGC	TGCTCACCATGGATCCTTCTTGGCCTGCTAATAGAGGCATC

## Sheet: Table S3
Table S3. The cis-elements of the identified MATE genes from wheat.
	Catergory			Al resistance elements	Light responsive elements																															Development related elements											Hormone responsive elements
			Total	2115	89	248	51	67	0	13	13	50	35	12	1	26	5	17	6	3	30	3	19	2	3	1	0	6	2	5	0	3	1	1	2	2	1	4	43	79	4	12	2	0	8	22	17	32	12
	gene name	Subject name	Total	GGNVS	G-Box	G-box	GT1-motif	Sp1	GATT-motif	ACE	ATCT-motif	Box 4	I-box	MRE	chs-Unit 1 m1	GATA-motif	box II	TCCC-motif	ATC-motif	GA-motif	TCT-motif	LAMP-element	AE-box	Gap-box	L-box	chs-CMA1a	CAG-motif	3-AF1 binding site	AT1-motif	GTGGC-motif	C-box	chs-CMA2a	AAAC-motif	Pc-CMA2c	chs-CMA2c	GCN4_motif	AACA_motif	circadian	CAT-box	CCGTCC-box	MSA-like	dOCT	HD-Zip 1	NON-box	OCT	RY-element	P-box	TCA-element	GARE-motif
Group A	TaMATE174	TraesCS7B03G0085800.1	127	15	2	6								2		1		2		1																											1
	TaMATE157	TraesCS7A03G0310300.1	116	14	2	4	2	2								2																								1								2
	TaMATE33	TraesCS2B03G1536400.1	122	14		2	1			1			1					1			1																			1									1
	TaMATE168	TraesCS7A03G1167100.1	105	10		1	3	1			1	1	1										1																1
	TaMATE203	TraesCS7D03G1113000.1	111	17	1	1	1	2		1			1			2					1		1																		1								1
	TaMATE184	TraesCS7B03G1034400.1	103	23	1	2	1	1								2	1				1		1
	TaMATE162	TraesCS7A03G0554100.1	120	30			2			1				1																									1	1							1
	TaMATE196	TraesCS7D03G0536900.1	107	9			1			1	1	2									1	1													1					2								1
	TaMATE176	TraesCS7B03G0372300.1	154	42	4	5	1					2	1	1							1																	1		1	1				1	3			1
	TaMATE194	TraesCS7D03G0293300.1	153	45		3	2	3															1									1
	TaMATE175	TraesCS7B03G0086300.1	98	12		1				1																														1						1	1	1
	TaMATE162	TraesCS7A03G0554100.1	152	30		3	3						2																							1					1							1
	TaMATE152	TraesCS6D03G0883600.1	120	13		1		1			2										1		1																	2						1
	TaMATE147	TraesCS6B03G1229500.1	136	37		2	1	1		1	1							1																					1	1									1
	TaMATE141	TraesCS6A03G1002600.1	33	33
	TaMATE142	TraesCS6A03G1002700.1	125	26		1		1													1																		1	2
	TaMATE148	TraesCS6B03G1229700.1	140	27		2		2				1																												1
	TaMATE153	TraesCS6D03G0883800.1	130	35	2	3		3								1												1	1
	TaMATE51	TraesCS3B03G0088900.1	151	39	1	6		1				1		1		1																								2									1
	TaMATE64	TraesCS3D03G0065600.1	145	47	1	4	1	3			1	1						1																						5								1
	TaMATE41	TraesCS3A03G0090100.1	150	34	3	8				2			1	1																									1	4								1
	TaMATE45	TraesCS3A03G0748300.1	110	24		1	1	1				2		1																										1							1
	TaMATE190	TraesCS7D03G0032200.1	105	24	1	4		2				1	1			2					1																		2	1								2
	TaMATE55	TraesCS3B03G0853900.1	111	18	2	5		1					1	1																		1							1	1
	TaMATE67	TraesCS3D03G0614500.1	160	39	3	4		1				1	2			1		1												1									2	4
	TaMATE76	TraesCS4A03G0646500.1	114	19	1	2								1																									2										1
	TaMATE89	TraesCS4D03G0130400.1	121	19	2	2		1								2	1	1			1		1																1								2
	TaMATE88	TraesCS4D03G0130300.1	116	28		4																				1													1									1
	TaMATE77	TraesCS4A03G0646500.1	131	35		2	1								1	1		1																					2									1
	TaMATE81	TraesCS4B03G0154500.1	120	28		1					1									1			1	1															1			1						1
	TaMATE25	TraesCS2A03G1238200.1	112	15		2						1									2				1															1								1
	TaMATE211	TraesCSU03G0139800.1	10	10
	TaMATE178	TraesCS7B03G0461100.1	161	14			3					2							1				1																	1
	TaMATE164	TraesCS7A03G0636600.1	182	72		2	1	2				1									1																		2	6					1
	TaMATE195	TraesCS7D03G0513200.1	123	9		4	3					1							1																				2	1									1
	TaMATE98	TraesCS5A03G0619800.1	82	13	2	3					1	1
	TaMATE113	TraesCS5B03G0636900.1	98	12	1	2	1									1					2																			1									1
	TaMATE112	TraesCS5B03G0636800.1	116	13		1		1																					1																		1
	TaMATE127	TraesCS5D03G0585400.1	123	9	2	5	1				1										1																		1									2	1
	TaMATE192	TraesCS7D03G0291500.1	119	33	1	2		1		1											2															1				1					1		1
	TaMATE156	TraesCS7A03G0307600.1	128	22	1	4		1				1	1								1																			2			1
	TaMATE173	TraesCS7B03G0081700.1	129	34	1	2		1		1			1					1	1																				1	5
	TaMATE86	TraesCS4B03G0796500.1	136	30	2	4	2	2					2								1									1																			1
	TaMATE94	TraesCS4D03G0712800.1	130	27	1	7	1	1					1								1									1																1	1
	TaMATE80	TraesCS4A03G1005700.1	147	30	1	7		3																																2		1				1
	TaMATE90	TraesCS4D03G0247400.1	157	21	4	8	1					1						1																				1		1			1			1
	TaMATE96	TraesCS5A03G0396000.1	127	24	2	5	1	1										1			2																			2		1
	TaMATE125	TraesCS5D03G0372800.1	137	25	1	5	1	1			1												2									1							1	2		1
	TaMATE102	TraesCS5A03G0838800.1	131	25	1	1	1	1				1				1																																1
	TaMATE129	TraesCS5D03G0801100.1	122	28		2	2	1				1	1									1																	3	2
	TaMATE114	TraesCS5B03G0824000.1	154	39	2	6	1	2			1						1																							3
	TaMATE100	TraesCS5A03G0792000.1	145	45	3	4		2								1																	1						1
	TaMATE101	TraesCS5A03G0792800.1	106	15		1										1		1					1
	TaMATE7	TraesCS1B03G0074100.1	134	17	4	5	1					2	1	1							1																	1		1	1				1	3			1
	TaMATE12	TraesCS1D03G0057900.1	112	15	2	4	1					3									1																										1	1
	TaMATE1	TraesCS1A03G0068000.1	15	15
	TaMATE69	TraesCS3D03G1116500.1	110	20	3	5	1	2		1		2	1																																1	2	1
	TaMATE46	TraesCS3A03G1172800.1	89	15		7	1	1				1						1																											1	1
	TaMATE57	TraesCS3B03G1404500.1	138	28	3	6	2	1		1		2								1	1													1											1	1	1	1
	TaMATE70	TraesCS3D03G1116600.1	117	5		2						1									2																		1	1							1
	TaMATE47	TraesCS3A03G1172900.1	103	11		1										1		1																						1								1
	TaMATE109	TraesCS5A03G1291000.1	119	23	1	4		2				1	1						1		1																			1						1
	TaMATE87	TraesCS4B03G0991800.1	117	15									3			2
	TaMATE35	TraesCS2D03G0482300.1	100	31	1	2		4					1																													1
	TaMATE28	TraesCS2B03G0598200.2	131	9		2																		1																							1	1
	TaMATE61	TraesCS3B03G1407600.1	150	43								1	1								1																		1	4		1				1		1	1
	TaMATE48	TraesCS3A03G1173900.1	114	22		2		3					1			1														1									1	1		1				2
	TaMATE62	TraesCS3B03G1407800.1	0	0
	TaMATE60	TraesCS3B03G1407400.1	105	31	2	2	1	1		1	1																												2
	TaMATE58	TraesCS3B03G1406200.2	119	32	2	5		1				1					1		1																				1			1				1		2
	TaMATE71	TraesCS3D03G1117400.1	115	30	3	3		1																															1			1				1
	TaMATE49	TraesCS3A03G1174300.1	132	27	2	3		1				2					1		1				1																2			1						1
	TaMATE117	TraesCS5B03G0892000.1	84	11								1	1										1					1
	TaMATE131	TraesCS5D03G0812000.1	92	12								1	2										1
	TaMATE110	TraesCS5B03G0084900.1	110	36								1	1										1					1
	TaMATE95	TraesCS5A03G0082100.1	90	14								1	1										1		1			1											1
	TaMATE124	TraesCS5D03G0106000.1	96	15			1					1	1										1		1			1											1
	TaMATE104	TraesCS5A03G0849800.1	85	12								1	1										1					1																			1
	TaMATE130	TraesCS5D03G0801400.1	140	25	3	8		1			1	1		1		1
	TaMATE103	TraesCS5A03G0838900.1	22	22
	TaMATE20	TraesCS2A03G0476300.1	112	12	1	1						1																											1									2
	TaMATE56	TraesCS3B03G1200900.1	133	31	2	4		1					1					2																						1
	TaMATE59	TraesCS3B03G1406700.1	121	10	1	1		1								1																							1	3		2					1
	TaMATE72	TraesCS3D03G1117700.1	134	21		2						1										1																	1	2					1	1
	TaMATE82	TraesCS4B03G0154600.1	47	47
	TaMATE83	TraesCS4B03G0302700.1	126	27	1	8						1						1												1							1
	TaMATE111	TraesCS5B03G0413100.1	110	24	1	1						1	1	1		1							1												1													1
	TaMATE116	TraesCS5B03G0876600.1	121	22	4	9																																		2
	TaMATE193	TraesCS7D03G0293000.1	147	18	1	2	3																																1	1							1	4
	TaMATE200	TraesCS2D03G1194100.1	120	16	1	2						1									1																	1										1
	Catergory				Light responsive elements																															Development related elements											Hormone responsive elements
			Total	1728	68	174	39	56	1	12	8	35	13	22	0	17	3	22	8	1	30	9	23	1	0	3	0	3	1	3	0	5	1	0	0	3	4	4	55	54	1	14	1	1	2	8	20	30	22
	gene name	Subject name	Total	GGNVS	G-Box	G-box	GT1-motif	Sp1	GATT-motif	ACE	ATCT-motif	Box 4	I-box	MRE	chs-Unit 1 m1	GATA-motif	box II	TCCC-motif	ATC-motif	GA-motif	TCT-motif	LAMP-element	AE-box	Gap-box	L-box	chs-CMA1a	CAG-motif	3-AF1 binding site	AT1-motif	GTGGC-motif	C-box	chs-CMA2a	AAAC-motif	Pc-CMA2c	chs-CMA2c	GCN4_motif	AACA_motif	circadian	CAT-box	CCGTCC-box	MSA-like	dOCT	HD-Zip 1	NON-box	OCT	RY-element	P-box	TCA-element	GARE-motif
Group B	TaMATE108	TraesCS5A03G0888200.1	90	16		1	1				1					1					2																		1								1
	TaMATE120	TraesCS5B03G0935800.1	199	17	2	5		2			1	1						1																					1
	TaMATE133	TraesCS5D03G0850400.1	119	23		3	1	1		1		1						1			1		2																1	1				1			1
	TaMATE106	TraesCS5A03G0888000.2	125	37																																												1
	TaMATE118	TraesCS5B03G0934400.1	126	8	1	5	2					1											1																1								1		1
	TaMATE134	TraesCS5D03G0850500.1	130	32		2	2																1														1		1									1
	TaMATE107	TraesCS5A03G0888100.1	127	18	1	3						1				2							2			1													1
	TaMATE119	TraesCS5B03G0935500.1	124	17	2									1		1					1		2			1
	TaMATE132	TraesCS5D03G0850300.1	95	21							1		2					1				1																										1
	TaMATE105	TraesCS5A03G0887600.1	112	17		2	2					1											2																2								1		1
	TaMATE23	TraesCS2A03G0693500.1	134	26	1	4	2									1							1																3	3		1					1	1	1
	TaMATE30	TraesCS2B03G0773700.1	121	12	1	2		1		2											1	1																		6		1				1		2
	TaMATE38	TraesCS2D03G0643900.1	139	21	2	4	1	2																													1			1
	TaMATE22	TraesCS2A03G0692900.2	126	26	1	3										1		1										1												1								1
	TaMATE30	TraesCS2B03G0773700.1	91	12			1				1		1	1				1																					2	1
	TaMATE37	TraesCS2D03G0643600.1	139	31	1	4		1										2										1											2	2							1		1
	TaMATE188	TraesCS7B03G1286900.1	101	10	1	3	1					1																											2								1		1
	TaMATE187	TraesCS7B03G1285600.1	91	11	1	2					1	1				1		1			1																		1								1
	TaMATE189	TraesCS7B03G1287200.1	122	13	1	2								2		1																								2							1	1
	TaMATE172	TraesCS7A03G1348900.1	167	30	3	6		1				1								1									1											2					1		3
	TaMATE207	TraesCS7D03G1276000.1	103	10	1	2		1				2	1																										1								1
	TaMATE194	TraesCS7D03G0293300.1	181	45	4	7		3					1			1																							1	3								2
	TaMATE161	TraesCS7A03G0535400.1	124	20	1	3						2		2			1	1																					1	1								1
	TaMATE195	TraesCS7D03G0513200.1	107	9	2												1																							1								2
	TaMATE181	TraesCS7B03G0352200.1	119	20	2	2			1			1		1		1		1												1		1				1			1	1		3						1
	TaMATE159	TraesCS7A03G0534600.1	114	22		2						2							1		1																		2										1
	TaMATE179	TraesCS7B03G0351400.1	8	8
	TaMATE42	TraesCS3A03G0117600.1	140	35		3													1				1																	1									1
	TaMATE52	TraesCS3B03G0155000.1	123	26	3	4	1	1				1		1																1									1									1	1
	TaMATE65	TraesCS3D03G0103800.1	156	41	3	5		1									1	1			1		1									1
	TaMATE16	TraesCS1D03G0839700.1	132	18	1	2	2											3			2							1																	1
	TaMATE209	TraesCSU03G0032200.1	133	10	1	2	1	1		1		1											2																	1								2
	TaMATE40	TraesCS3A03G0058300.1	113	13		1	1			1		1				1							3																									2
	TaMATE64	TraesCS3D03G0065600.1	124	47		2												1			1																			1		3
	TaMATE167	TraesCS7A03G1146600.1	146	14	1	2	1	1													1																											1
	TaMATE183	TraesCS7B03G1006500.1	132	28	1	2		1						1							1	1		1														1										1	1
	TaMATE202	TraesCS7D03G1091700.3	136	26		1		1						2																										3
	TaMATE155	TraesCS7A03G0070800.1	113	10	2	3		1				1		1							1																		1
	TaMATE205	TraesCS7D03G1146500.1	100	10	1	2	2							1		1			1			1																	1										1
	TaMATE185	TraesCS7B03G1077500.1	117	8	1	2	2					4		1					2		1	1																	1										2
	TaMATE170	TraesCS7A03G1206000.1	91	14	2	2	2							2					1			2														1		1									1	1
	TaMATE135	TraesCS5D03G0914100.1	118	22		2	1	2		1								1																					2	2									1
	TaMATE116	TraesCS5B03G0876600.1	126	22		2	1	3																															2									1	1
	TaMATE169	TraesCS7A03G1198300.1	119	15	2	1								1							2	1	1							1		1						1	2				1						1
	TaMATE204	TraesCS7D03G1139900.1	25	25
	TaMATE171	TraesCS7A03G1216000.1	91	12																	2																		1	1									1
	TaMATE178	TraesCS7B03G0461100.1	111	14	1	2				1											3																		2			1						1	1
	TaMATE206	TraesCS7D03G1156600.1	92	13				1													1																		3	2									1
	TaMATE166	TraesCS7A03G0998400.1	107	18	1	2	1	7																															2	2									1
	TaMATE201	TraesCS7D03G0954500.1	16	16
	TaMATE19	TraesCS2A03G0423200.1	86	19		6								1							2																												1
	TaMATE27	TraesCS2B03G0552200.1	106	14	2	4					1																																				1
	TaMATE5	TraesCS1A03G0919900.1	145	41		2		2					2			1																							1	2		1
	TaMATE17	TraesCS1D03G0902900.2	29	29
	TaMATE67	TraesCS3D03G0614500.1	161	39	1	4	2	4			1			1				1								1
	TaMATE44	TraesCS3A03G0673200.1	116	18	1	5	2					2	1																																		1
	TaMATE54	TraesCS3B03G0770000.1	114	12	2	4	1				1	2							1		1																			1						2		1
	TaMATE43	TraesCS3A03G0585600.2	26	26
	TaMATE53	TraesCS3B03G0665800.1	177	63		7		2																															3	4
	TaMATE66	TraesCS3D03G0539100.1	135	26		5				1			1	1		2		1																						1
	TaMATE21	TraesCS2A03G0643900.1	106	26		3		1																															1			2						1
	TaMATE29	TraesCS2B03G0726800.1	97	11	3	1	1							1		1		1																		1		1	1
	TaMATE36	TraesCS2D03G0604900.1	46	46
	TaMATE2	TraesCS1A03G0073500.1	134	18	1	1						1																									1		1							2
	TaMATE18	TraesCS2A03G0285000.1	131	29	1	1		2		1																													1			1							1
	TaMATE34	TraesCS2D03G0298500.1	38	38
	TaMATE26	TraesCS2B03G0395600.1	12	12
	TaMATE151	TraesCS6D03G0772400.1	151	60		1		1				2				1							1										1						1	3
	TaMATE140	TraesCS6A03G0900600.1	93	21		1		1				1									2
	TaMATE146	TraesCS6B03G1083100.1	15	15
	TaMATE6	TraesCS1B03G0034600.1	125	33		1		2		1		2	2																			1								1							1	1
	TaMATE10	TraesCS1B03G1006700.1	98	11			1					1							1																													1
	TaMATE11	TraesCS1D03G0021300.1	108	18	1	4	3					1						3																					1		1
	TaMATE13	TraesCS1D03G0064400.1	102	16	3	2							2								1	1															1		1							1
	TaMATE50	TraesCS3B03G0063200.1	126	12	1	2	1			1											1		2																									1
	TaMATE160	TraesCS7A03G0534800.1	103	19	1	2								1									1																1
	TaMATE180	TraesCS7B03G0351500.1	157	20	3	7		1																															1	2						2	1	1	1
	TaMATE208	TraesCS7D03G1276800.1	146	47		2		8		1																						1								2		1					2
	Catergory				Light responsive elements																															Development related elements											Hormone responsive elements
			Total	488	18	51	18	21	0	6	0	17	8	3	0	13	1	3	3	2	12	3	4	1	0	1	4	1	0	0	0	1	0	0	0	3	0	4	24	15	1	2	2	0	0	13	5	9	5
	gene name	Subject name	Total	GGNVS	G-Box	G-box	GT1-motif	Sp1	GATT-motif	ACE	ATCT-motif	Box 4	I-box	MRE	chs-Unit 1 m1	GATA-motif	box II	TCCC-motif	ATC-motif	GA-motif	TCT-motif	LAMP-element	AE-box	Gap-box	L-box	chs-CMA1a	CAG-motif	3-AF1 binding site	AT1-motif	GTGGC-motif	C-box	chs-CMA2a	AAAC-motif	Pc-CMA2c	chs-CMA2c	GCN4_motif	AACA_motif	circadian	CAT-box	CCGTCC-box	MSA-like	dOCT	HD-Zip 1	NON-box	OCT	RY-element	P-box	TCA-element	GARE-motif
Group C	TaMATE78	TraesCS4A03G0790600.1	121	9	1	1						1				1			1								1									1					1							1	1
	TaMATE123	TraesCS5B03G1361100.1	125	17	1	1	2					1	1								1																	1		2						1	1
	TaMATE137	TraesCS5D03G1204100.1	117	8	1							1	5			2					1					1												1		2								1	1
	TaMATE92	TraesCS4D03G0569700.1	138	25	2	5		1		1		1				1					1						1									1			4							2
	TaMATE84	TraesCS4B03G0641100.1	139	24	1	4		1		1		1				1				1							1												4							3
	TaMATE73	TraesCS4A03G0117600.1	118	23	1	2		3		1						1			1								1												2	1						2
	TaMATE123	TraesCS5B03G1361100.1	104	17		2						1						1			2																		1			1
	TaMATE79	TraesCS4A03G0866700.1	138	31		3				1											3							1																		2
	TaMATE136	TraesCS5D03G1139200.1	146	40	2	4		2										2																						2		1							1
	TaMATE199	TraesCS7D03G0862000.1	141	50				2				1																																				1
	TaMATE182	TraesCS7B03G0740100.1	30	30
	TaMATE165	TraesCS7A03G0872000.1	130	24		2	3	1																															1
	TaMATE177	TraesCS7B03G0452400.1	97	6	1							1											1																2	1								2
	TaMATE163	TraesCS7A03G0627000.1	119	8			2	1				1				1				1			1																	1							1	1	1
	TaMATE197	TraesCS7D03G0609700.1	117	9			2					3							1				1									1								1							1	1	1
	TaMATE128	TraesCS5D03G0719700.1	128	14	1	3	2			1		1																										1	1				1
	TaMATE99	TraesCS5A03G0759600.1	118	11		5				1											1																						1				1
	TaMATE8	TraesCS1B03G0576700.1	108	23										1		1							1																2							1		1
	TaMATE14	TraesCS1D03G0482200.1	116	9	2	3	1	1					1	1		2																							4							1
	TaMATE3	TraesCS1A03G0505100.1	101	10		1	1	1				1	1	1		1					1			1												1		1	1							1		1
	TaMATE24	TraesCS2A03G0961300.1	116	17		1	2	1				1																												2
	TaMATE39	TraesCS2D03G0903000.1	6	6
	TaMATE32	TraesCS2B03G1064800.1	100	17	1	1	2	1				1																												1
	TaMATE145	TraesCS6B03G0785400.1	124	19	2	6	1									1	1					1																	1
	TaMATE150	TraesCS6D03G0579700.1	124	19	1	4		2													1	1																		1							1
	TaMATE139	TraesCS6A03G0691400.1	128	22	1	3		4				1				1					1	1																	1	1
	Catergory				Light responsive elements																															Development related elements											Hormone responsive elements
			Total	527	15	33	6	24	0	5	1	11	2	2	0	3	1	3	2	0	7	0	2	0	1	0	0	0	1	1	1	0	0	0	0	0	0	5	11	20	0	1	0	0	0	2	1	6	2
	gene name	Subject name	Total	GGNVS	G-Box	G-box	GT1-motif	Sp1	GATT-motif	ACE	ATCT-motif	Box 4	I-box	MRE	chs-Unit 1 m1	GATA-motif	box II	TCCC-motif	ATC-motif	GA-motif	TCT-motif	LAMP-element	AE-box	Gap-box	L-box	chs-CMA1a	CAG-motif	3-AF1 binding site	AT1-motif	GTGGC-motif	C-box	chs-CMA2a	AAAC-motif	Pc-CMA2c	chs-CMA2c	GCN4_motif	AACA_motif	circadian	CAT-box	CCGTCC-box	MSA-like	dOCT	HD-Zip 1	NON-box	OCT	RY-element	P-box	TCA-element	GARE-motif
Group D	TaMATE138	TraesCS6A03G0149600.1	117	16	2	4		1				1				1		1			1								1										1										1
	TaMATE210	TraesCS6A03G0149600.2	132	50	1	1		3				1																											1	2
	TaMATE144	TraesCS6B03G0212600.1	100	22		2					1	1																											1	1							1	2
	TaMATE143	TraesCS6A03G1050800.2	150	58	1	3	1	5				1																											2	2									1
	TaMATE154	TraesCS6D03G0932700.1	27	27
	TaMATE8	TraesCS1B03G0576700.1	122	23	1			4		1									1																					2								1
	TaMATE15	TraesCS1D03G0727000.1	134	48	1	8		7		1							1														1									2						1
	TaMATE4	TraesCS1A03G0758200.1	36	36
	TaMATE85	TraesCS4B03G0664600.1	107	24	1			1					1			1		1																				1	1	1
	TaMATE93	TraesCS4D03G0589400.1	140	48		2		2		1		1		1		1																								4
	TaMATE75	TraesCS4A03G0491000.1	92	21	1	5						1																												1						1
	TaMATE89	TraesCS4D03G0130400.1	115	19		6				2			1						1		2																		2			1						2
	TaMATE97	TraesCS5A03G0416500.1	97	20	1							1									1																	1
	TaMATE111	TraesCS5B03G0413100.1	105	24	2	1	2					1																										1
	TaMATE126	TraesCS5D03G0384500.1	103	23	1	1	2					1									1																	1	1	2
	TaMATE74	TraesCS4A03G0132700.1	115	28	2			1				1		1							1																	1		3
	TaMATE149	TraesCS6D03G0932700.1	17	17
	TaMATE191	TraesCS7D03G0070500.1	104	23	1		1					1						1			1		2		1					1									2									1
[truncated: 81 more columns]

## Sheet: TableS4
Table S4. Gene-specific primers used for qRT-PCR analysis
Name	Forward（5’—3’）	Reverse（5’—3’）
TaMATE9	TGCAGCAGTTGCTCATGTTAT	AGATGTTTCAAGTTTGGTGGC
TaMATE49	GCGTTCCACTTGGTGTTGTTC	ACCTCTTTGGTCCAGTCTGTTCTT
TaMATE85	TATCCCACCGAGCCTTAAATCC	GACGCCAGAGTGACGCAGAAA
TaMATE93	TGATCTTGATATGTCGGCTCGTC	AATGTCACCGCTACCACCCTC
TaMATE100	TACATGCAACGCTCCACTGT	CGATGCAAGAGCCATTTCGG
TaMATE114	CGTTCCACTGTCCTGCTCAT	TTGAGGAGGCCAGCAATGAG
TaMATE137	TGACGGTGCTGCTCGTGGTG	TTTGGGGTGCCTCCTTGTGGT
TaMATE161	TGCTCATCATCTCGGTCTCCAAC	CACCAATCTTCTGCCATCCACA
TaMATE195	CCAAAGCTGGAGACTTCGGT	AGATCAGCACCAACCCCATG
Ubiquitin	TGACACCATCGACAACGTGA	GAGGGTGGACTCCTTCTGGA
